# Supplementary material for: Improvement in the chlorine evolution activity of an SnOx@IrO2–Ta2O5 electrode and its application in the electrolysis of an extremely dilute chlorine-containing solution
Source: Royal Society of Chemistry journal article supplement (doi:10.1039/d4nj01829j), 2024-01-01
Supplement: d4nj01829j1.pdf [file d4nj01829j1.pdf]

## Supplementary Information

# Improvement of chlorine evolution activity of $\text{SnO}_x@\text{IrO}_2\text{-Ta}_2\text{O}_5$ electrode and its application in electrolysis of extremely dilute chlorine-containing solution

*Lin Liu, Ming Wang, Yiping Zhan, Zhiqian Lin, Shenglei Xiong, Hailin Ye, Yu Luo, Fenghe Fu,*

*Zhandong Ren\* and Yuchan Zhu\**

School of Chemical and Environmental Engineering, Wuhan Polytechnic University, Wuhan,

430023, P. R. China.

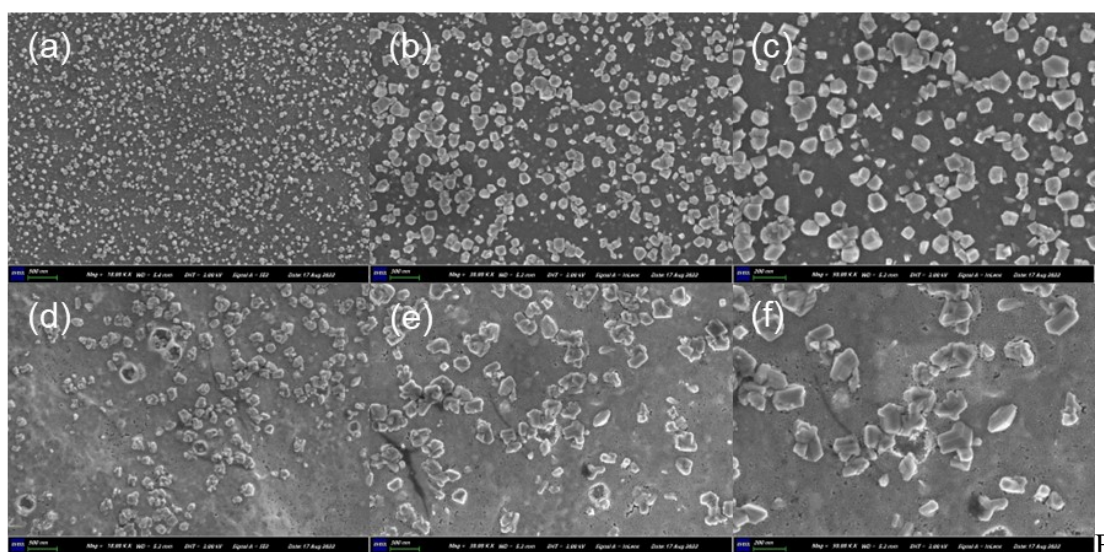

Figure S1 The SEM images of IrO<sub>2</sub>-Ta<sub>2</sub>O<sub>5</sub> (a-c) and SnO<sub>x</sub>@IrO<sub>2</sub>-Ta<sub>2</sub>O<sub>5</sub>-3 (d-f) electrodes.

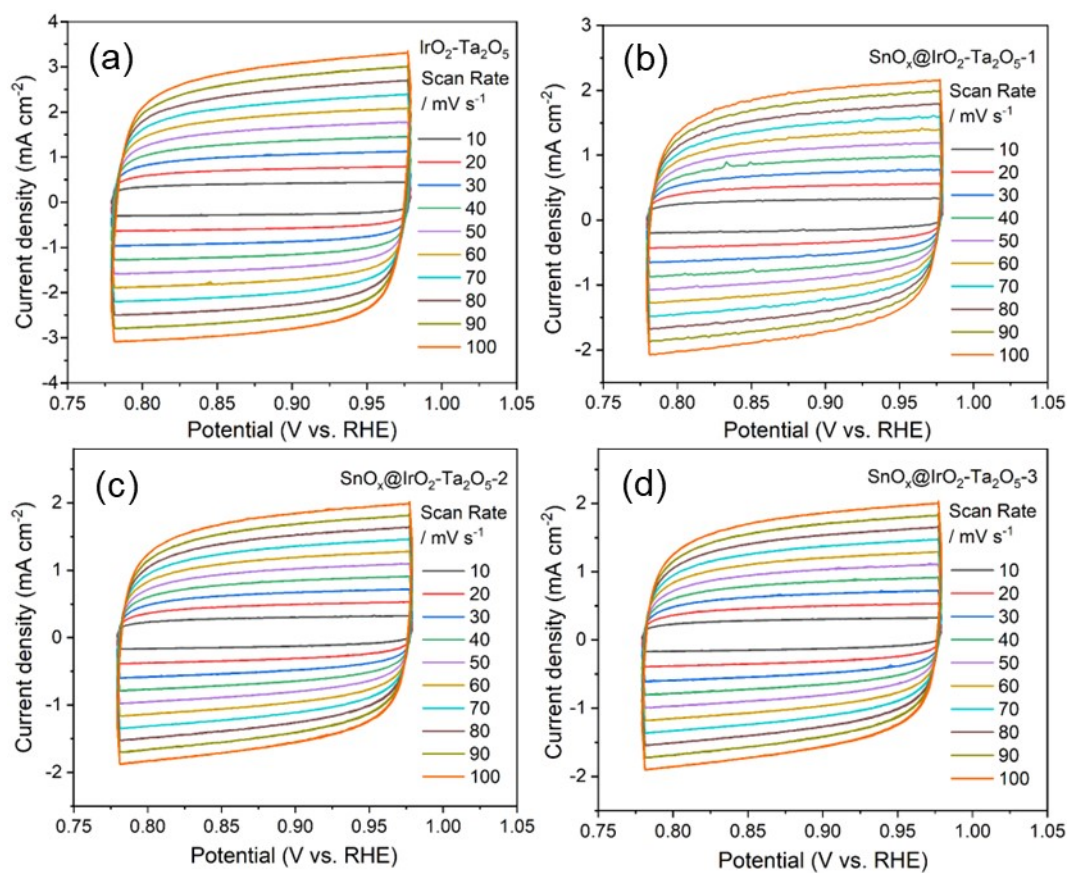

Figure S2 The cyclic voltammograms of IrO<sub>2</sub>-Ta<sub>2</sub>O<sub>5</sub> (a) and SnO<sub>x</sub>@IrO<sub>2</sub>-Ta<sub>2</sub>O<sub>5</sub>-1(2,3) (b-d) electrodes with different scan rate at potential of 0.78 ~ 0.98 V.

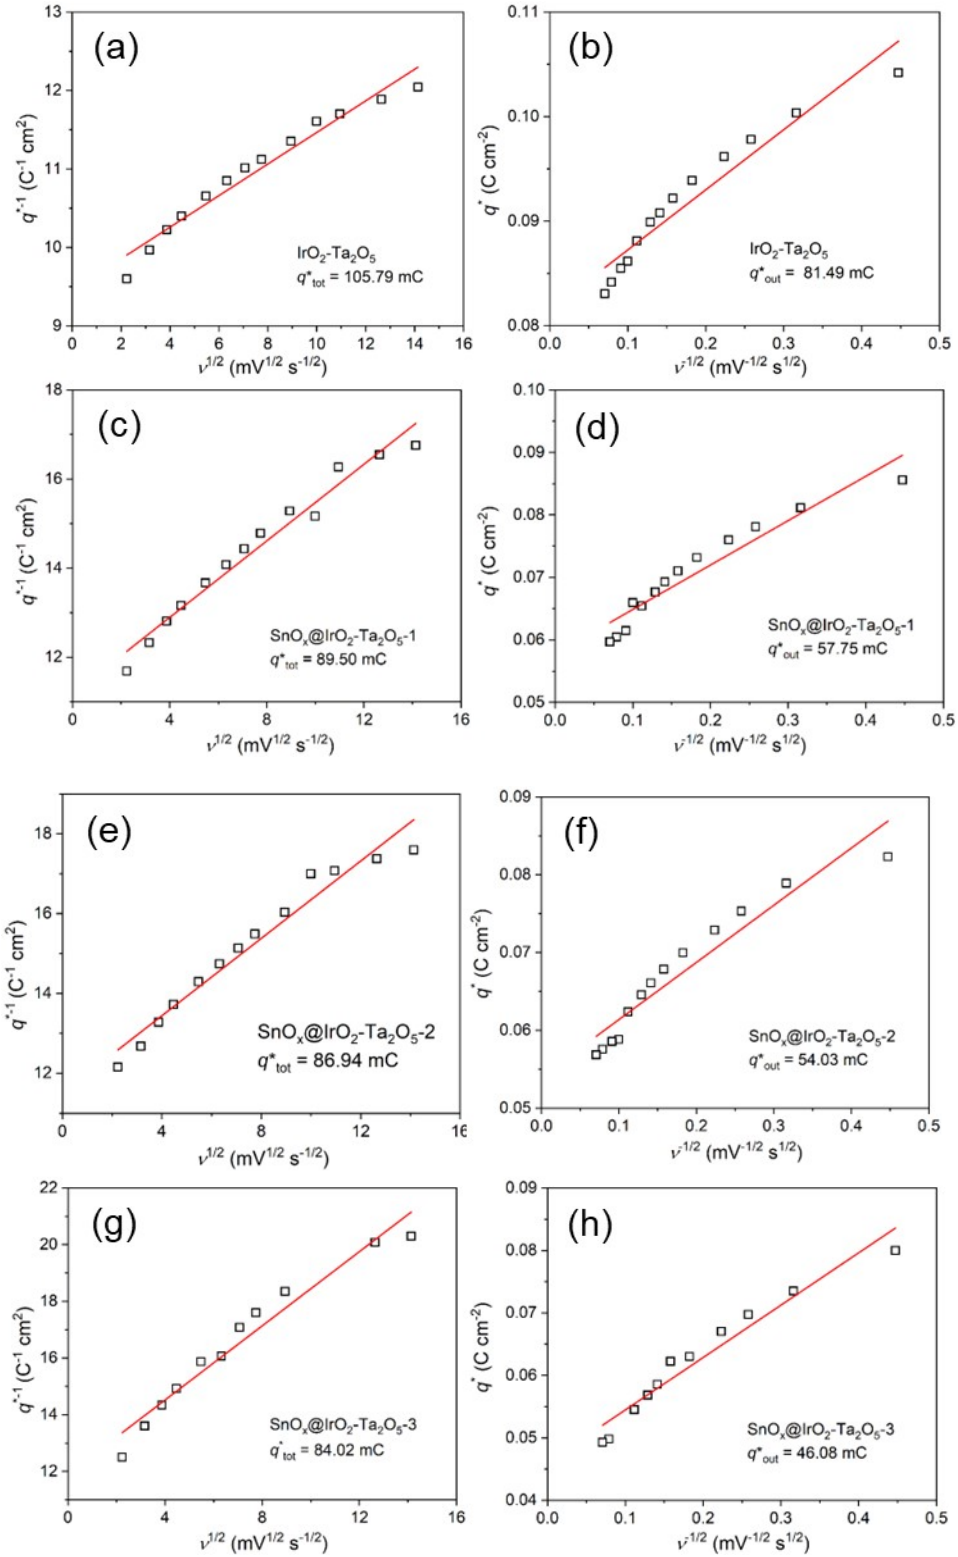

Figure S3 The total surface charge ( $q^{*}_{tot}$ ) and outer surface charge ( $q^{*}_{out}$ ) of IrO<sub>2</sub>-Ta<sub>2</sub>O<sub>5</sub> (a-b) and SnO<sub>x</sub>@IrO<sub>2</sub>-Ta<sub>2</sub>O<sub>5</sub>-1(2,3) (c-h) electrodes.

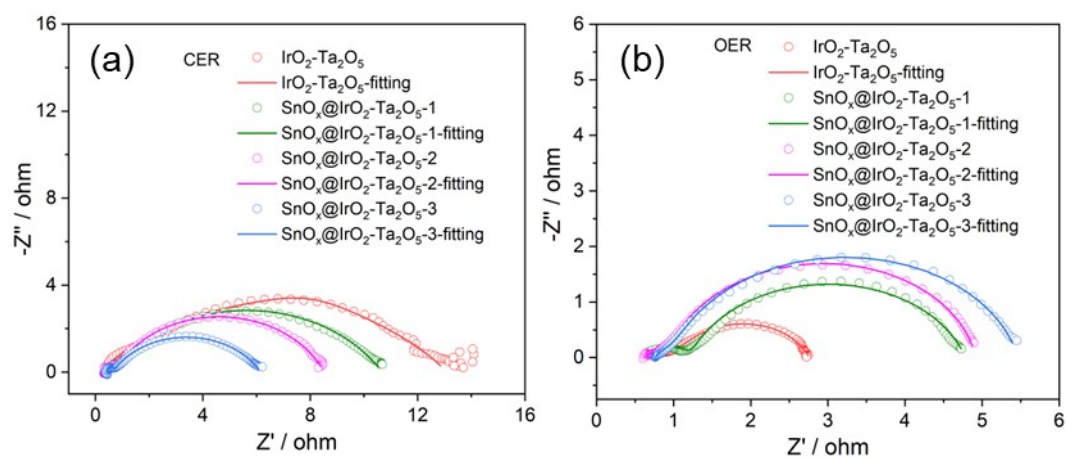

Figure S4 The electrochemical impedance spectroscopy (EIS) measurements of IrO<sub>2</sub>-Ta<sub>2</sub>O<sub>5</sub> and SnO<sub>x</sub>@IrO<sub>2</sub>-Ta<sub>2</sub>O<sub>5</sub>-1(2,3) electrodes at 1.48 V in the CER (a) and at 1.64 V OER (b).

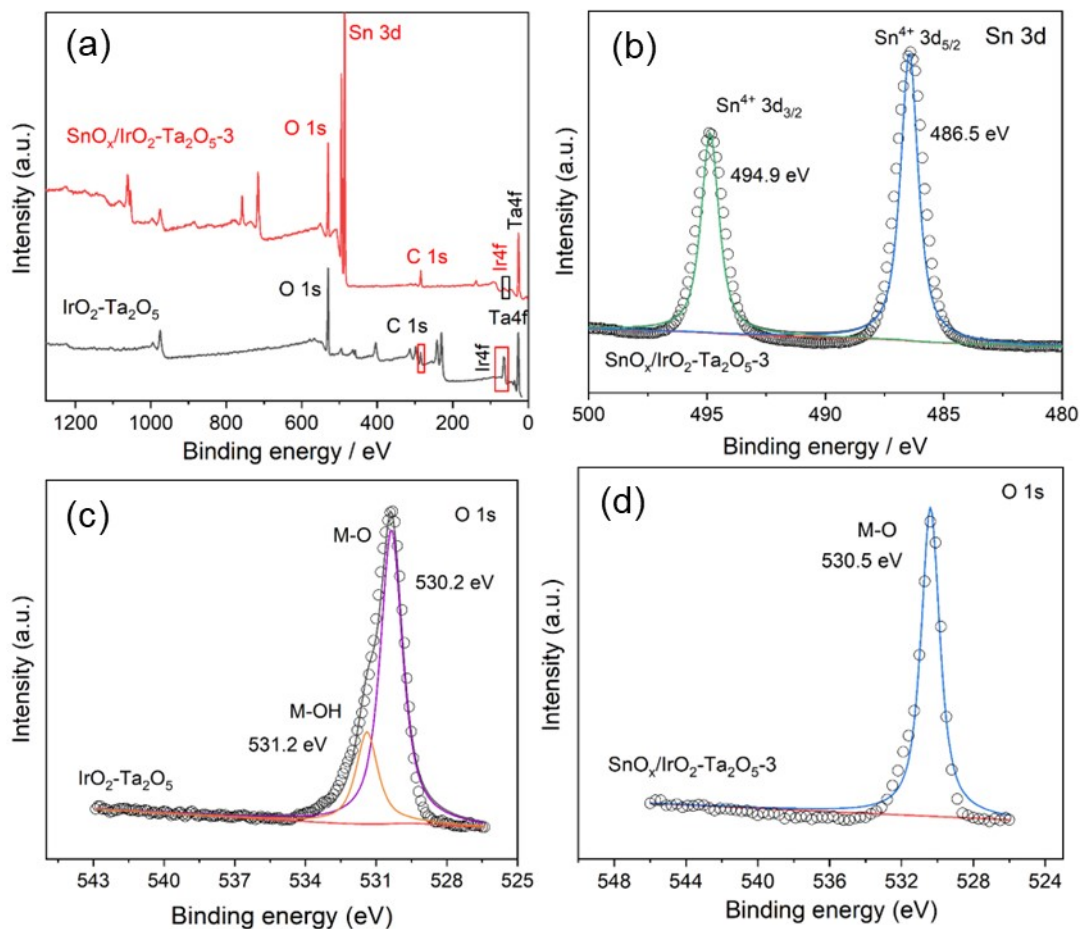

Figure S5 The XPS whole spectra of  $\text{IrO}_2\text{-Ta}_2\text{O}_5$  (c) and  $\text{SnO}_x@\text{IrO}_2\text{-Ta}_2\text{O}_5\text{-3}$  (a). The XPS core-level spectra of Sn 3d obtained from  $\text{SnO}_x@\text{IrO}_2\text{-Ta}_2\text{O}_5\text{-3}$  (b). The XPS core-level spectra of O 1s obtained from  $\text{IrO}_2\text{-Ta}_2\text{O}_5$  (c) and  $\text{SnO}_x@\text{IrO}_2\text{-Ta}_2\text{O}_5\text{-3}$  (d).

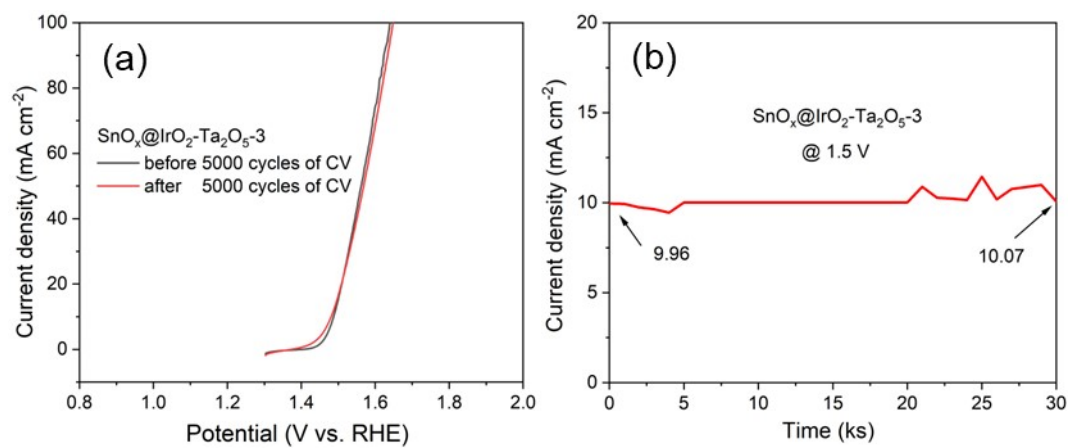

Figure S6 The accelerated lifetime tests of  $\text{SnO}_x@ \text{IrO}_2\text{-Ta}_2\text{O}_5\text{-3}$  electrode after 5000 cycles of CVs (a) and the 30 ks of chronoamperometry testing (b).

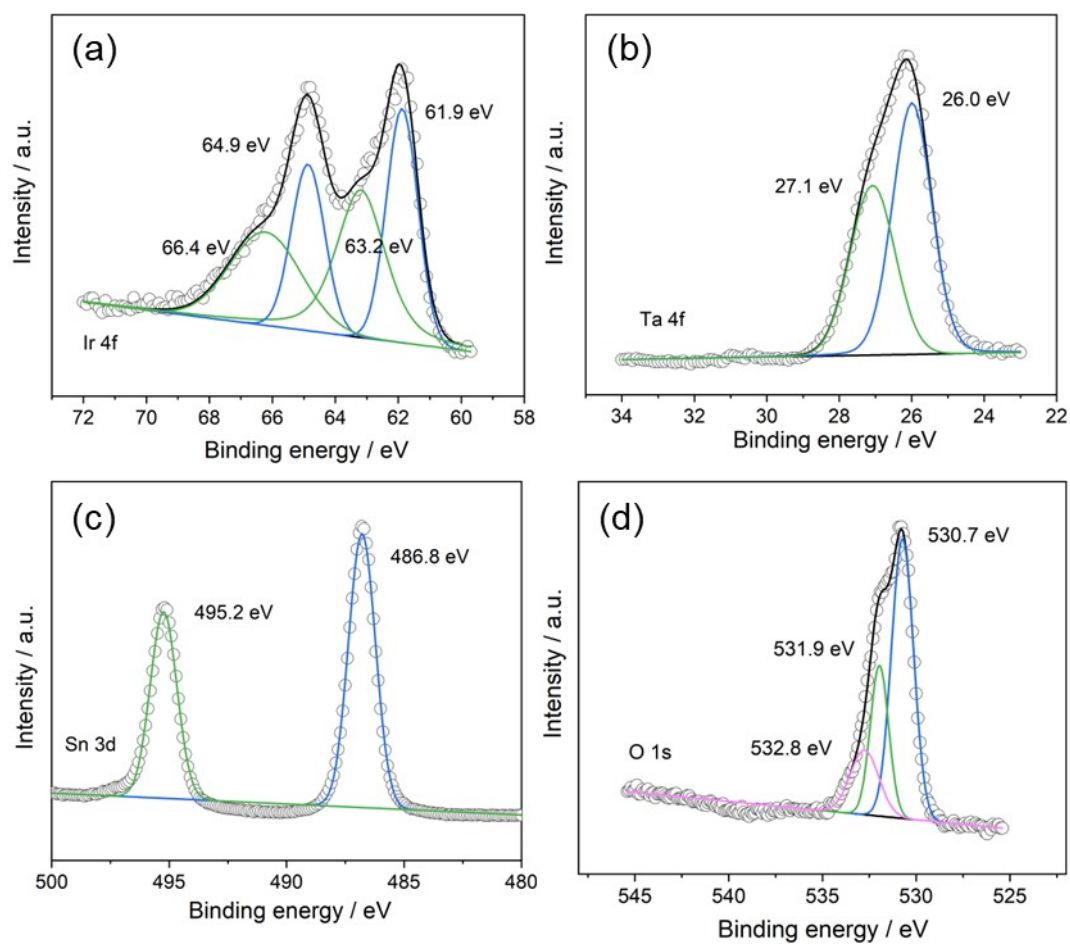

Figure S7 The XPS core-level spectra of Ir 4f (a), Ta 4f (b), Sn 3d (c) and O1s (d) obtained from  $\text{SnO}_x@\text{IrO}_2\text{-Ta}_2\text{O}_5\text{-3}$  electrode after accelerated service life test.



Table S1 The loading of Ir, Ta and Sn of the IrO<sub>2</sub>-Ta<sub>2</sub>O<sub>5</sub> and SnO<sub>x</sub>@IrO<sub>2</sub>-Ta<sub>2</sub>O<sub>5</sub> electrodes by XRF

| Electrode                                                             | Ir:Ta:Sn<br>(molar ratio) | The loading / $\mu\text{g cm}^{-2}$ |        |       |
|-----------------------------------------------------------------------|---------------------------|-------------------------------------|--------|-------|
|                                                                       |                           | Ir                                  | Ta     | Sn    |
| IrO <sub>2</sub> -Ta <sub>2</sub> O <sub>5</sub>                      |                           | 169.40                              | 138.52 |       |
| SnO <sub>x</sub> @IrO <sub>2</sub> -Ta <sub>2</sub> O <sub>5</sub> -1 | 4.2:5.0:0.8               | 109.40                              | 138.36 | 24.01 |
| SnO <sub>x</sub> @IrO <sub>2</sub> -Ta <sub>2</sub> O <sub>5</sub> -2 | 3.7:5.0:1.3               | 123.16                              | 146.12 | 41.22 |
| SnO <sub>x</sub> @IrO <sub>2</sub> -Ta <sub>2</sub> O <sub>5</sub> -3 | 3.3:5.0:1.7               | 127.31                              | 152.31 | 54.17 |

Table S2 Fitting parameters of equivalent circuit of IrO<sub>2</sub>-Ta<sub>2</sub>O<sub>5</sub> and SnO<sub>x</sub>@IrO<sub>2</sub>-

| Ta <sub>2</sub> O <sub>5</sub> -1(2,3) electrodes |                                                                       |                           |                              |
|---------------------------------------------------|-----------------------------------------------------------------------|---------------------------|------------------------------|
| Reaction                                          | Electrodes                                                            | $R_s/\Omega \text{ cm}^2$ | $R_{ct}/\Omega \text{ cm}^2$ |
| CER                                               | IrO <sub>2</sub> -Ta <sub>2</sub> O <sub>5</sub>                      | 0.370                     | 11.0                         |
|                                                   | SnO <sub>x</sub> @IrO <sub>2</sub> -Ta <sub>2</sub> O <sub>5</sub> -1 | 0.413                     | 10.1                         |
|                                                   | SnO <sub>x</sub> @IrO <sub>2</sub> -Ta <sub>2</sub> O <sub>5</sub> -2 | 0.367                     | 7.81                         |
|                                                   | SnO <sub>x</sub> @IrO <sub>2</sub> -Ta <sub>2</sub> O <sub>5</sub> -3 | 0.425                     | 5.54                         |
| OER                                               | IrO <sub>2</sub> -Ta <sub>2</sub> O <sub>5</sub>                      | 0.697                     | 1.99                         |
|                                                   | SnO <sub>x</sub> @IrO <sub>2</sub> -Ta <sub>2</sub> O <sub>5</sub> -1 | 0.630                     | 3.56                         |
|                                                   | SnO <sub>x</sub> @IrO <sub>2</sub> -Ta <sub>2</sub> O <sub>5</sub> -2 | 0.581                     | 3.76                         |
|                                                   | SnO <sub>x</sub> @IrO <sub>2</sub> -Ta <sub>2</sub> O <sub>5</sub> -3 | 0.763                     | 4.44                         |
